# Supplementary material
Source: HighWire-hosted journal article supplement (https://hw-f5-jim.highwire.org/content/65/5/926)
Supplement: inline-supplementary-material-1 [file inline-supplementary-material-1.pdf]

Supplementary Table 1. Common variants found in the screening of *GATA2*, *GATA4* and *GATA6* genes.

| Gene         | Position | dbSNP ID    | Nucleotide variant | Amino acid change | MAF (%)  |          | p    | MAF (%) |        |
|--------------|----------|-------------|--------------------|-------------------|----------|----------|------|---------|--------|
|              |          |             |                    |                   | Patients | Controls |      | ESP     | 1000G  |
| <i>GATA2</i> | I1       | rs559062253 | c.-46+13C>T        | -                 | T=0.9    | T=0.8    | 1.00 | -       | -      |
|              | E2       | rs1573858   | c.15C>G            | p.Pro5=           | C=26.2   | C=28.5   | 0.43 | C=34.9  | C=36   |
|              | E3       | rs2335052   | c.490G>A           | p.Ala164Thr       | A=15.3   | A=14.3   | 0.65 | A=16.2  | A=17.8 |
|              |          | rs34870876  | c.564G>A           | p.Thr188=         | C=3.8    | C=5.2    | 0.36 | C=5.3   | C=6.6  |
|              | I4       | rs11708606  | c.1018-19C>T       | -                 | T=26.2   | T=28.7   | 0.39 | T=19    | T=20.2 |
|              | I5       | rs2713604   | c.1143+203A>G      | -                 | A=30     | A=27.3   | 0.36 | -       | A=31.4 |
|              | E6       | rs34172218  | c.1233G>A          | p.Ala411=         | A=3.1    | A=4.8    | 0.20 | A=2.9   | A=2.4  |
|              |          | rs3803      | c.*482C>T          | -                 | T=23.6   | T=28     | 0.13 | -       | T=20.3 |
| rs45463801   |          | c.*546C>T   | -                  | T=6.6             | T=6.7    | 1.00     | -    | T=4.1   |        |
| <i>GATA4</i> | E1       | rs61277615  | c.-534C>T          | -                 | T=3.3    | T=4.7    | 0.33 | -       | T=8.2  |
|              | I2       | rs10503425  | c.617-64G>C        | -                 | C=10.6   | C=10     | 0.75 | -       | C=14.8 |
|              | E6       | rs3729856   | c.1129A>G          | p.Ser377Gly       | G=9      | G=9.2    | 1.00 | G=14    | G=12.9 |
| <i>GATA6</i> | I6       | rs3764962   | c.1620+7A>G        | -                 | G=1.4    | G=2.7    | 0.19 | G=1.3   | G=1.8  |

E: exon; I: intron; dbSNP ID: single nucleotide polymorphism identification in the database dbSNP; MAF: minor allele frequency; p: p-value; ESP: Exome Sequencing Project in European American population; 1000G: 1000 Genomes Project in European populations. Statistical significance was considered as p-value <0.002 (0.05/22). Positions of variants based on *GATA2* RefSeq NM\_032638.4, NP\_116027.2; *GATA4* RefSeq NM\_002052.3, NP\_002043.2; *GATA6* RefSeq NM\_005257.3, NP\_005248.2.

Supplementary Table 2. Summary of *in silico* analyses of rare variants found in *GATA2*, *GATA4* and *GATA6* genes.

| Gene         | Nucleotide variant | Amino acid change  | Mutation taster | SIFT      | Polyphen-2 | Other <i>in silico</i> tools                                                                                            |
|--------------|--------------------|--------------------|-----------------|-----------|------------|-------------------------------------------------------------------------------------------------------------------------|
| <i>GATA2</i> | c.-77G>A           | -                  | Disease Causing | -         | -          | Alterations on mRNA secondary structure.<br>Affect binding sites for transcription factors.                             |
|              | c.*508G>A          | -                  | Polymorphism    | -         | -          | No effect.                                                                                                              |
| <i>GATA4</i> | c.-306C>T          | -                  | Polymorphism    | -         | -          | No effect.                                                                                                              |
|              | c.-294G>T          | -                  | Polymorphism    | -         | -          | Alterations on mRNA secondary structure.                                                                                |
|              | c.699G>A           | p.Thr233=          | Disease Causing | -         | -          | No effect.                                                                                                              |
|              | c.783+51G>A        | -                  | Polymorphism    | -         | -          | -                                                                                                                       |
|              | c.822C>T           | p.Cys274=          | Disease Causing | -         | -          | No effect.                                                                                                              |
|              | c.909+25G>A        | -                  | Polymorphism    | -         | -          | -                                                                                                                       |
|              | c.1027G>A          | p.Ala343Thr        | Polymorphism    | Tolerated | Benign     | Amino acid conserved across mammals.<br>Alterations on mRNA secondary structure.<br>Changes in protein phosphorylation. |
|              | c.1056C>T          | p.Asn352=          | Polymorphism    | -         | -          | No effect.                                                                                                              |
|              | c.-181G>A          | -                  | Disease Causing | -         | -          | No effect.                                                                                                              |
|              | c.296T>C           | p.Val99Ala         | Polymorphism    | Damaging  | Benign     | No effect.                                                                                                              |
| <i>GATA6</i> | c.849G>A           | p.Ala283=          | Polymorphism    | -         | -          | No effect.                                                                                                              |
|              | c.851C>G           | p.Ala284Gly        | Polymorphism    | Tolerated | Damaging   | No effect.                                                                                                              |
|              | c.970_978del       | p.His324_His326del | Polymorphism    | Damaging  | -          | No effect.                                                                                                              |
|              | c.1302+20C>T       | -                  | Polymorphism    | -         | -          | -                                                                                                                       |
|              | c.1374C>T          | p.Asn458=          | Disease Causing | -         | -          | No effect.                                                                                                              |
|              | c.1663C>G          | p.Pro555Ala        | Disease Causing | Tolerated | Damaging   | Amino acid conserved across mammals.<br>Alterations on mRNA secondary structure.                                        |

-: not analyzed. Positions relative to GATA2RefSeq NM\_032638.4, NP\_116027.2; GATA4RefSeq NM\_002052.3, NP\_002043.2; GATA6RefSeq NM\_005257.3, NP\_005248.2.
